# Supplementary figures and images for: Stability of AumAgn(m+n= 1–6) clusters supported on a F-center MgO(100) surface
Source: Royal Society of Chemistry journal article supplement (doi:10.1039/c8cp05187a), 2018-01-01

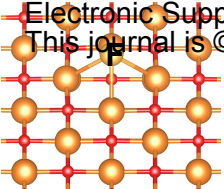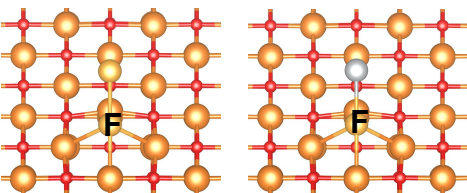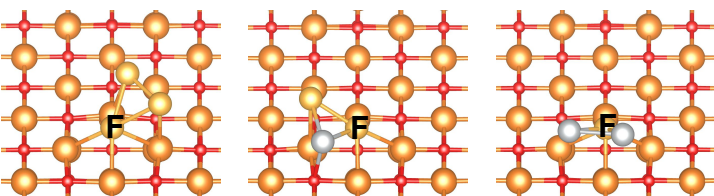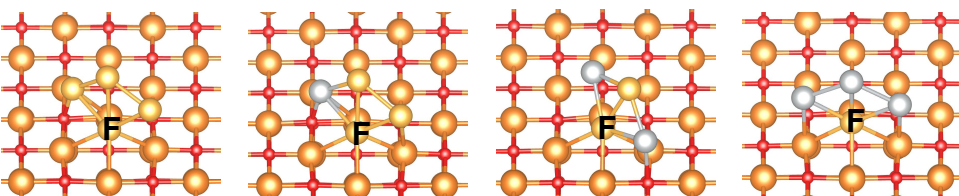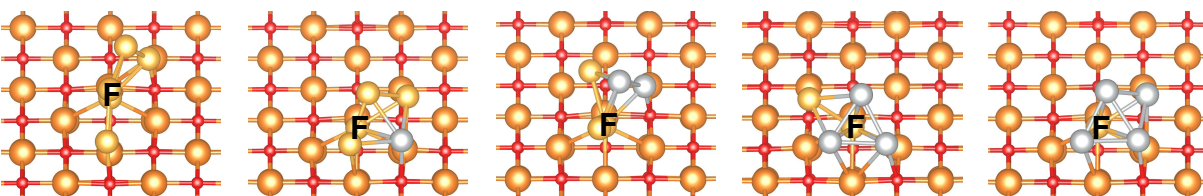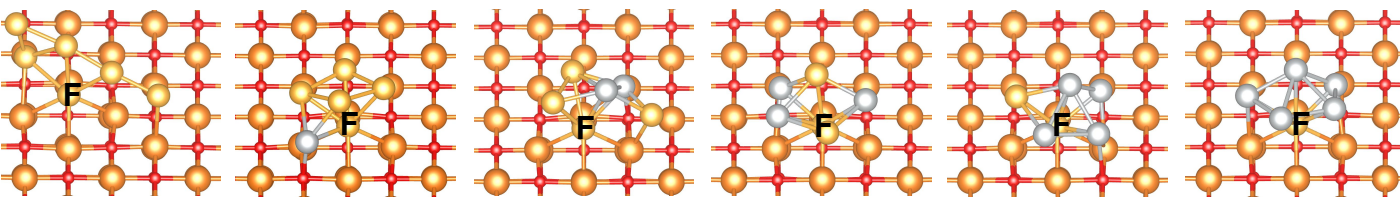

Supplement: c8cp05187a1.pdf [file c8cp05187a1.pdf]
